# Supplementary material for: An accurate analytic representation of the water pair potential
Source: Royal Society of Chemistry journal article supplement (doi:10.1039/b809435g), 2008-01-01
Supplement: b809435g.zip [file b809435g.zip]

Table 1: Intermolecular parameters of the CC-pol-8s stationary point structures of water dimer. Distances in Å, angles in degrees. See Ref. [1] for definitions and atom labeling.

| No. | index | $r_{\text{H}_2\text{O}_2}$ | $\theta_{\text{O}_1\text{H}_2\text{O}_2}$ | $\theta_{\text{H}_3\text{O}_2\text{O}_1}$ | $\theta_{\text{H}_4\text{O}_2\text{O}_1}$ | $\tau_{\text{O}_2\text{H}_2\text{O}_1\text{H}_1}$ | $\tau_{\text{H}_3\text{O}_2\text{O}_1\text{H}_2}$ | $\tau_{\text{H}_4\text{O}_2\text{O}_1\text{H}_2}$ |
|-----|-------|----------------------------|-------------------------------------------|-------------------------------------------|-------------------------------------------|---------------------------------------------------|---------------------------------------------------|---------------------------------------------------|
| 1   | 0     | 1.9468                     | 171.03                                    | 108.82                                    | 108.82                                    | 180.00                                            | 123.23                                            | -123.23                                           |
| 2   | 1     | 1.9648                     | 167.68                                    | 106.78                                    | 135.97                                    | 142.59                                            | 160.00                                            | 26.13                                             |
| 3   | 2     | 1.9687                     | 166.52                                    | 110.27                                    | 145.04                                    | 180.00                                            | 180.00                                            | 0.00                                              |
| 4   | 1     | 2.2666                     | 114.70                                    | 131.47                                    | 47.02                                     | -133.75                                           | 111.16                                            | 180.00                                            |
| 5   | 1     | 2.2685                     | 112.71                                    | 143.42                                    | 48.56                                     | -151.15                                           | -116.32                                           | -167.86                                           |
| 6   | 3     | 2.2721                     | 110.11                                    | 155.29                                    | 50.60                                     | 180.00                                            | 180.00                                            | 180.00                                            |
| 7   | 2     | 3.4247                     | 56.92                                     | 53.05                                     | 53.05                                     | 180.00                                            | -97.86                                            | 97.86                                             |
| 8   | 3     | 3.1220                     | 92.07                                     | 70.83                                     | 70.83                                     | -63.23                                            | 180.00                                            | 66.11                                             |
| 9   | 1     | 2.5515                     | 110.11                                    | 127.66                                    | 127.66                                    | 0.00                                              | -90.00                                            | 90.00                                             |
| 10  | 2     | 2.7073                     | 111.15                                    | 127.66                                    | 127.66                                    | 0.00                                              | 0.00                                              | 180.00                                            |

## References

- [1] G. S. Tschumper, M. N. Leininger, B. C. Hoffman, E. F. Valeev, H. F. Schaefer III, and M. Quack, J. Chem. Phys. **116**, 690 (2002).
